# Supplementary material for: Multiple Imputation Approaches Applied to the Missing Value Problem in Bottom-Up Proteomics
Source: MDPI journal article supplement (doi:10.3390/ijms22179650), 2021-09-06
Supplement: s1 [file s1]

## **TITLE**

Multiple Imputation Approaches Applied to the Missing Value Problem in Bottom-up Proteomics

## **AUTHORS**

Miranda L. Gardner<sup>1,2</sup> and Michael A. Freitas<sup>\*1,2</sup>

<sup>1</sup>Ohio State Biochemistry Program, The Ohio State University, Columbus Ohio

<sup>2</sup>Cancer Biology and Genetics, Wexner Medical Center, The Ohio State University, Columbus, Ohio

\*Corresponding author email: [freitas.5@osu.edu](mailto:freitas.5@osu.edu)

## **TABLE OF CONTENTS**

Figure S1. MDA-MB-468 whole cell proteomics logFC protein expression

Figure S2. MDA-MB-468 whole cell proteomics  $-\log_{10} q$ -value mean

Figure S3. EZH2 IP logFC protein expression

Figure S4. EZH2 IP  $-\log_{10} q$ -value mean

Figure S5. EZH2 IP missingness distribution of top 100 proteins

Figure S6. SUZ12 IP spread plots of  $-\log_{10} q$ -value mean vs logFC

Figure S7. SUZ12 IP logFC protein expression

Figure S8. SUZ12 IP  $-\log_{10} q$ -value mean

Figure S9. SUZ12 IP missingness distribution of top 100 proteins

Table S2. Ranking of PRC2 proteins identified in EZH2 and SUZ12 IPs

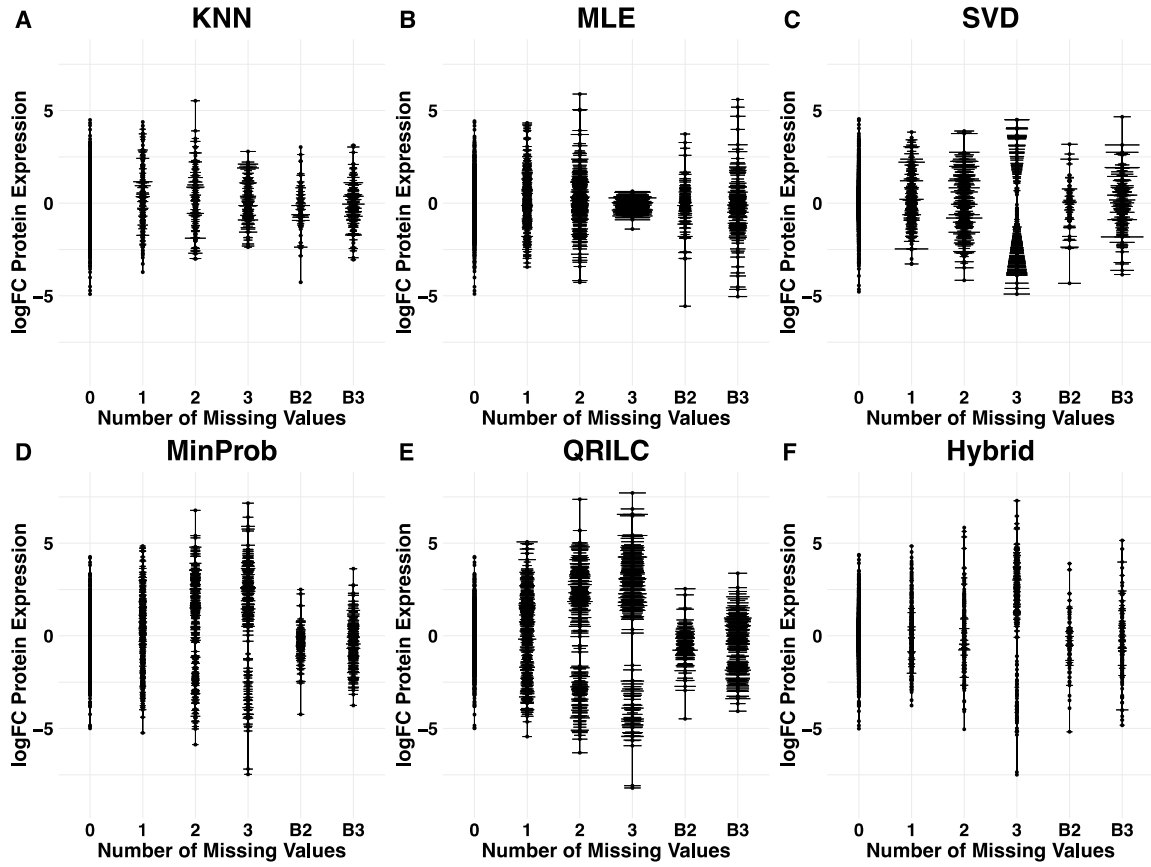

**Supplemental Figure S1.** Range of logFC protein expression as a function of the number and type of missing values in MDA-MB-468 following 25 consecutive iterations of each imputation method. The number of missing values can be missing in one sample group as 0, 1, 2 or 3 or in any combination of both sample groups as B2 or B3. The horizontal lines represent the standard deviation in the logFC values across the multiple imputations scaled by a factor of 0.5.

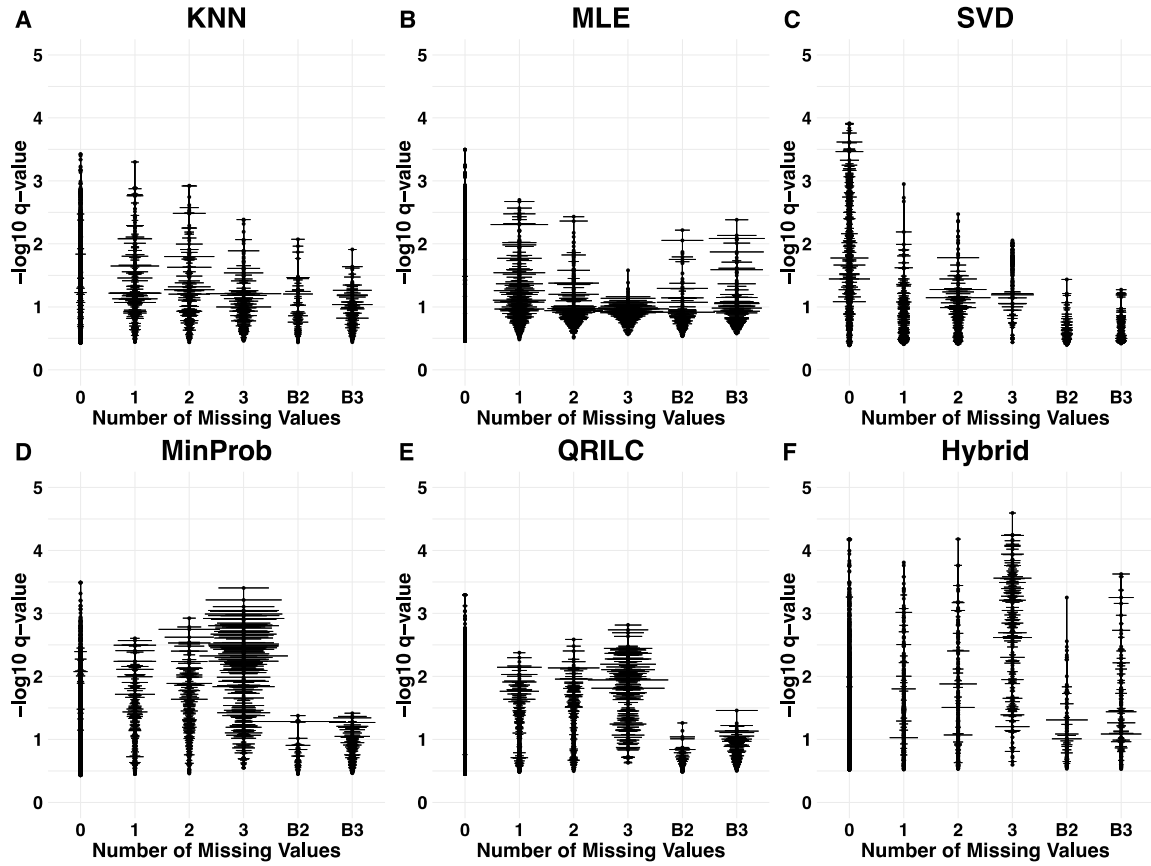

**Supplemental Figure S2.** Range of  $-\log_{10} q\text{-value}$  mean as a function of the number and type of missing values in MDA-MB-468 following 25 consecutive iterations of each imputation method. The number of missing values can be missing in one sample group as 0, 1, 2 or 3 or in any combination of both sample groups as B2 or B3. The horizontal lines represent the range of  $q\text{-value}$  means across the multiple imputations scaled by a factor of 0.5.

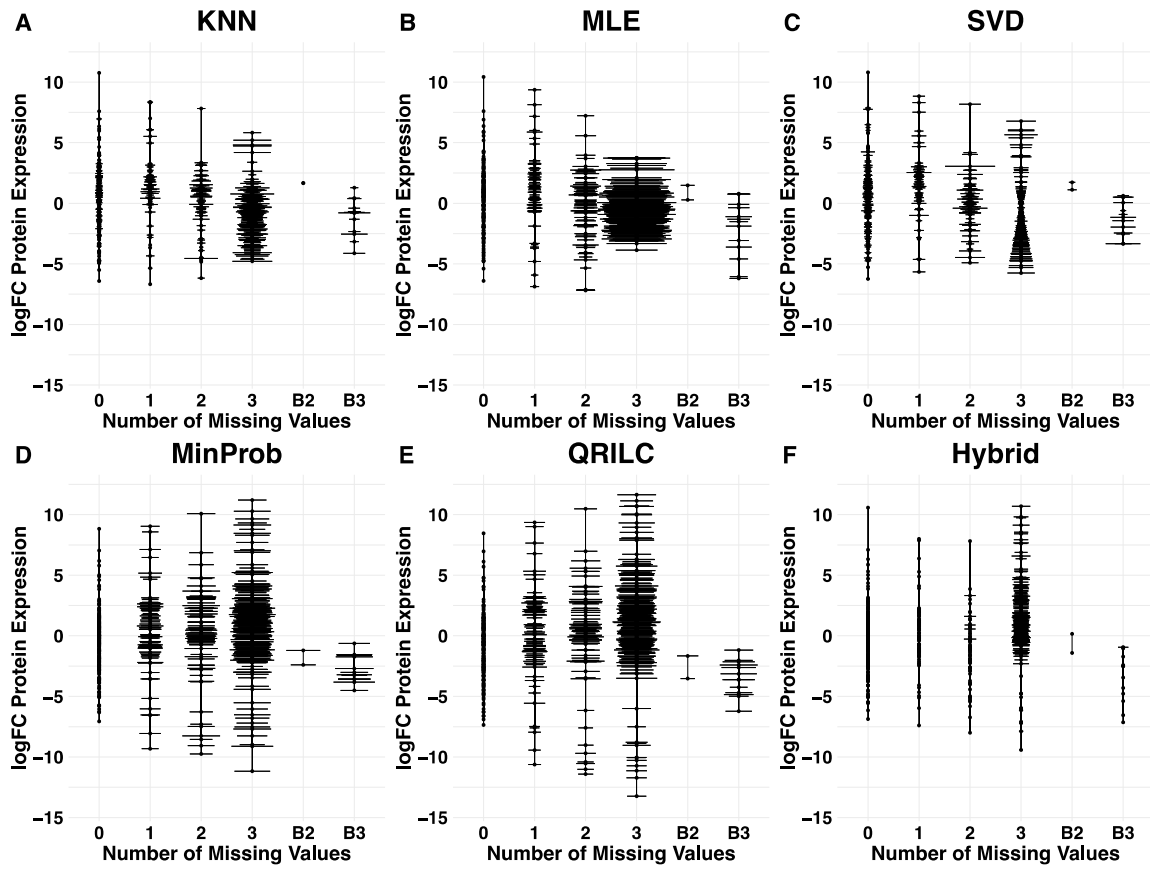

**Supplemental Figure S3.** Range of logFC protein expression as a function of the number and type of missing values in EZH2 IP compared to IgG control. Data was processed as described in Supplemental Figure S1.

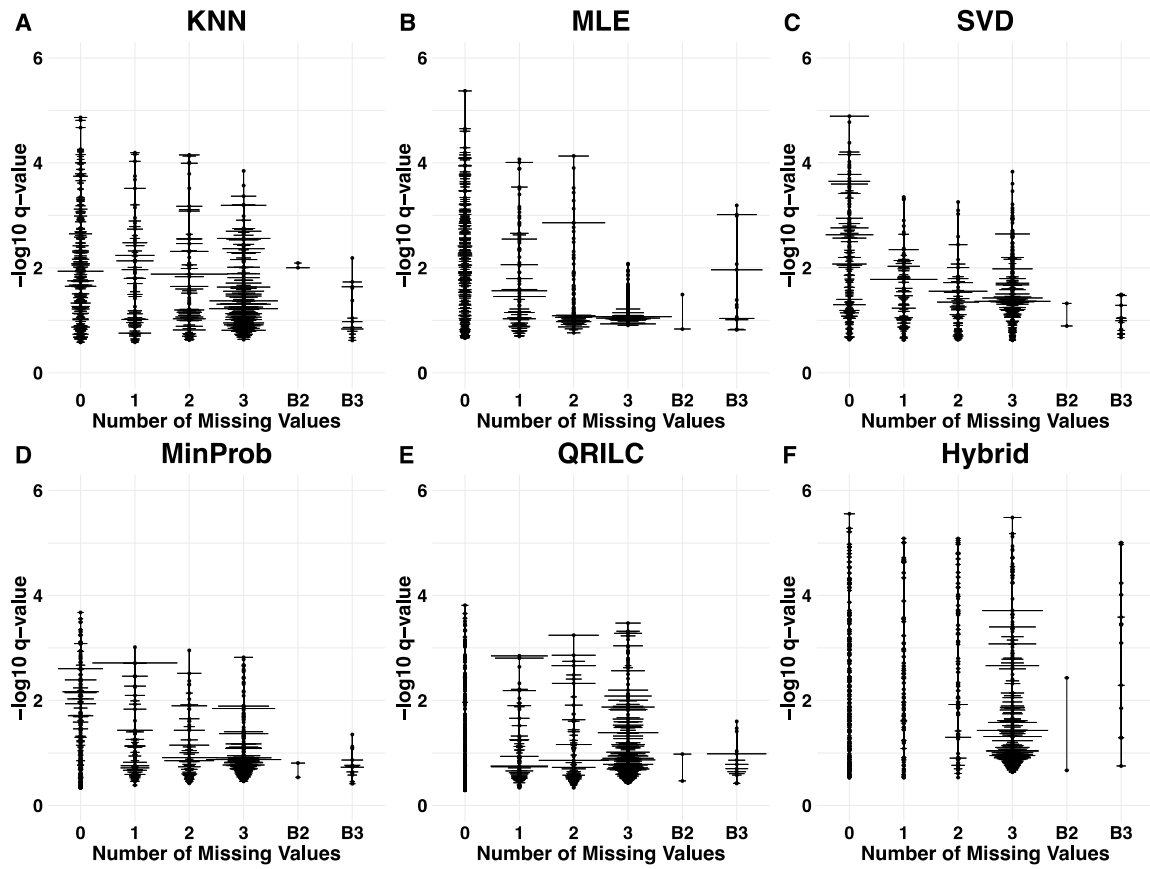

**Supplemental Figure S4.** Range of  $-\log_{10} q\text{-value}$  mean as a function of the number and type of missing values in EZH2 IP compared to IgG control. Data was processed as described in Supplemental Figure S2.

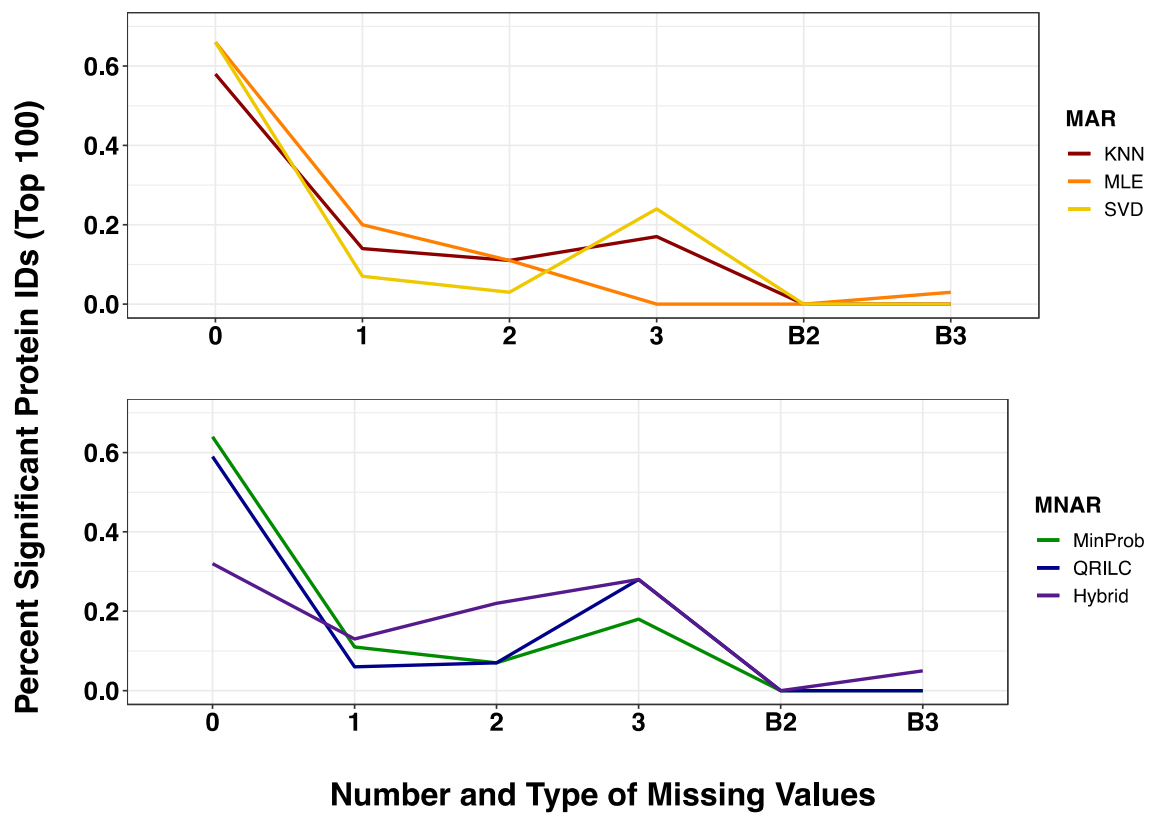

**Supplemental Figure S5.** Distribution of missingness across all imputation methods with the top 100 significant proteins identified in EZH2 IPs ( $n = 3$ ). Data was processed as described in Figure 3.

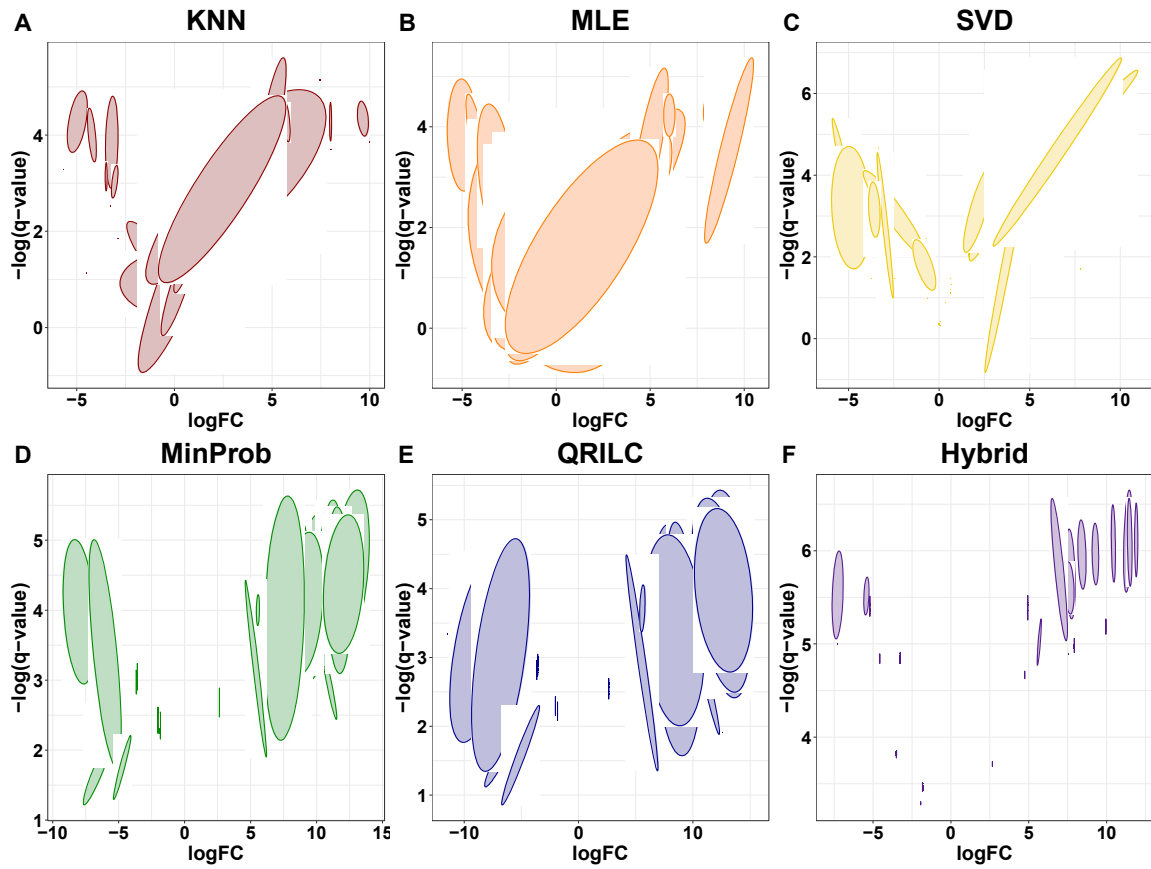

**Supplemental Figure S6.** Spread plots of  $-\log q\text{-value}$  vs  $\log FC$  for merged top proteins (**Supplemental Table S4**) across all imputation methods for SUZ12 IP data. Data was processed as described in Figure 4.



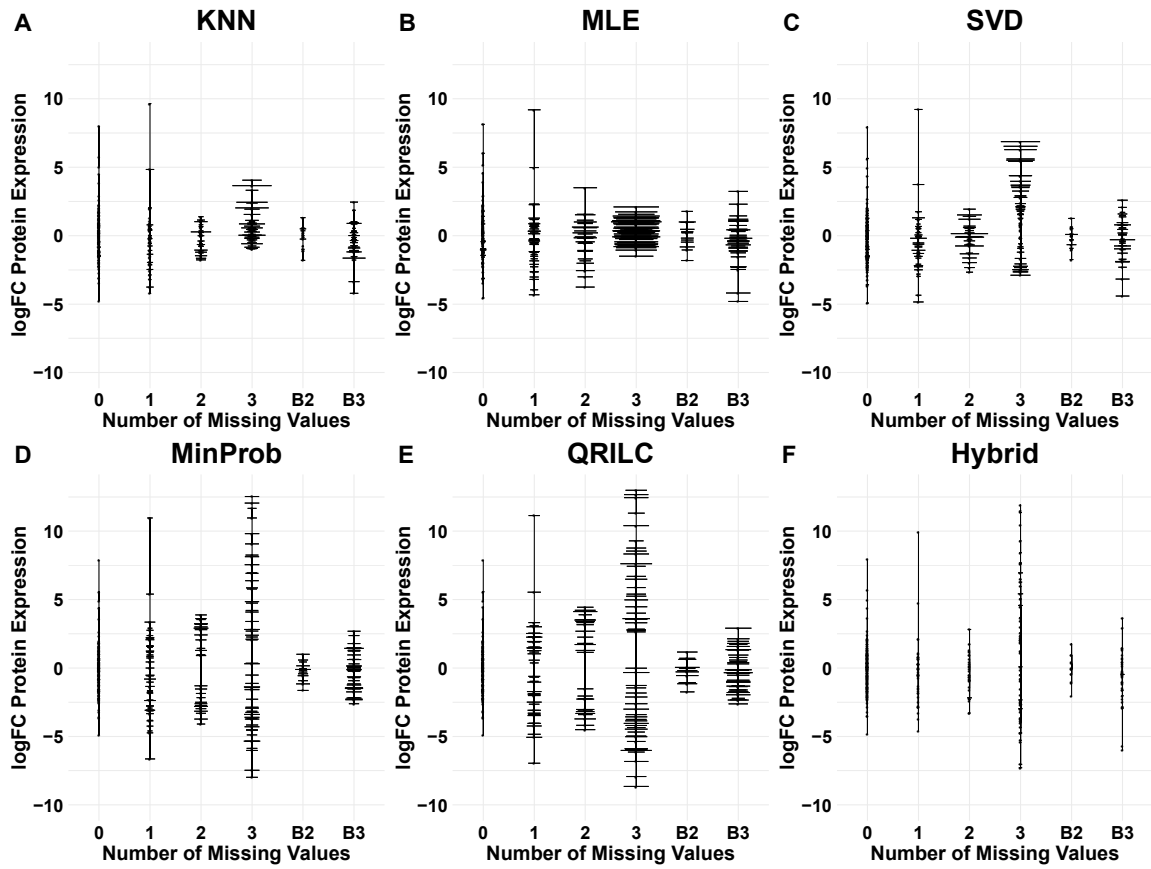

**Supplemental Figure S7.** Range of logFC protein expression as a function of the number and type of missing values in SUZ12 IP compared to IgG control. Data was processed as described in Supplemental Figure S1.

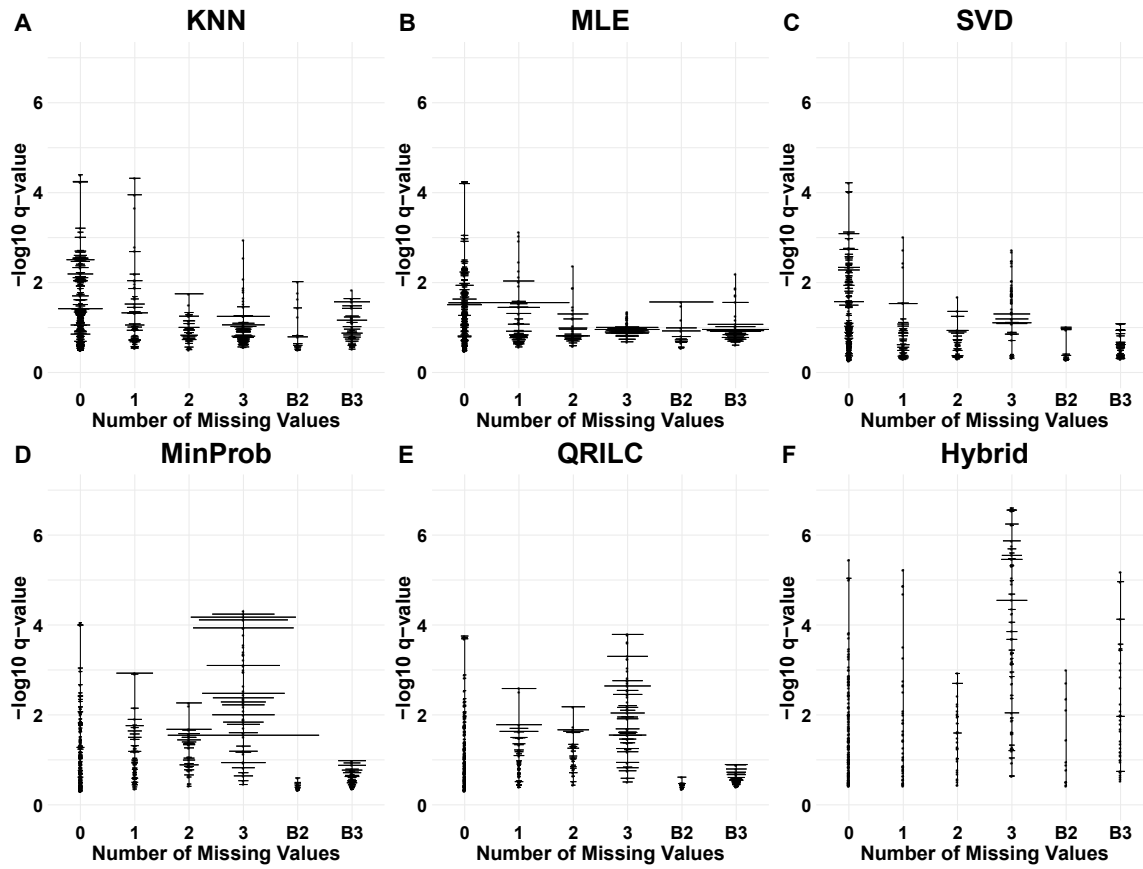

**Supplemental Figure S8.** Range of  $-\log_{10} q\text{-value}$  mean as a function of the number and type of missing values in SUZ12 IP compared to IgG control. Data was processed as described in Supplemental Figure S2.

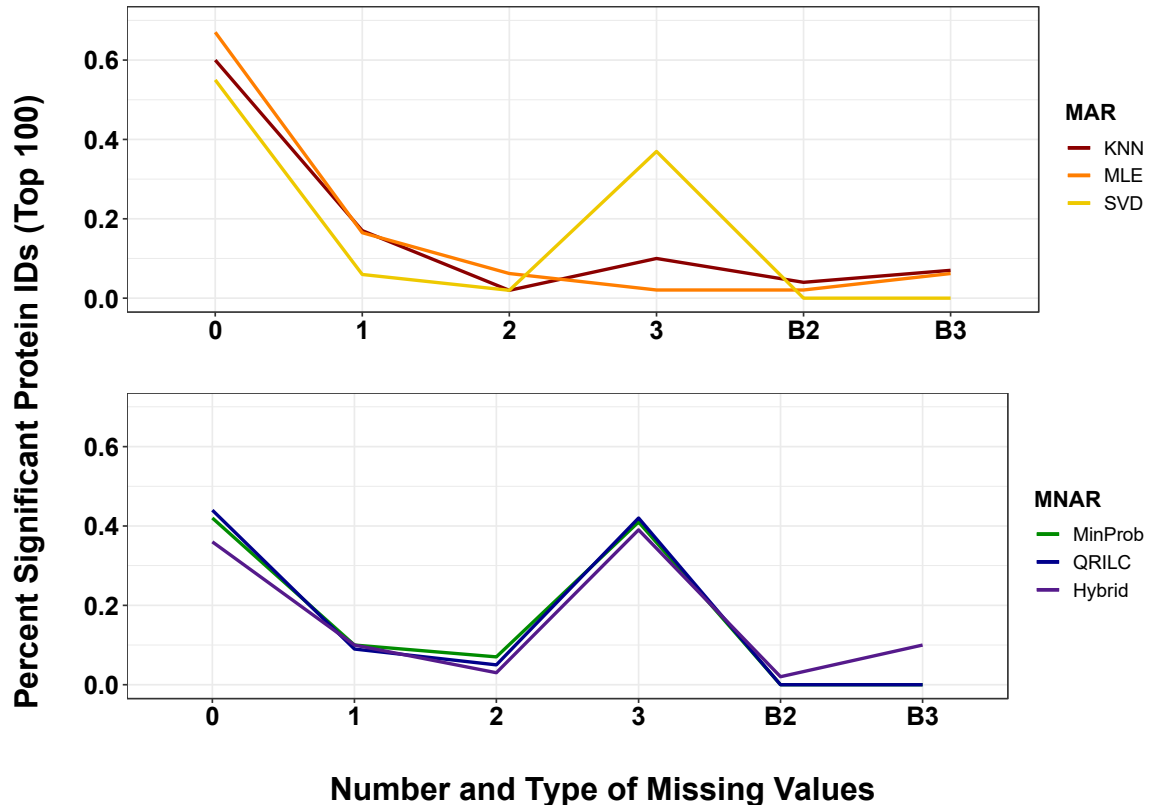

**Supplemental Figure S9.** Distribution of missingness across all imputation methods with the top 100 significant proteins identified in SUZ12 IPs (n = 3). Data was processed as described in Figure 3.

**A**

| PRC2 Protein | EZH2 KNN | EZH2 MLE | EZH2 SVD | EZH2 MinDet | EZH2 MinProb | EZH2 QRILC | EZH2 Hybrid |
|--------------|----------|----------|----------|-------------|--------------|------------|-------------|
| AEBP2        | 62       | 158      | 42       | 6           | 35           | 56         | 46          |
| EED          | 20       | 4        | 33       | 38          | 4            | 4          | 18          |
| EZH2         | 24       | 176      | 12       | 1           | 26           | 30         | 6           |
| JARID2       | 125      | 216      | 18       | 3           | 34           | 44         | 17          |
| PCL          | 127      | 157      | 24       | 7           | 42           | 29         | 21          |
| RbAp46       | 455*     | 328      | 150      | 13          | 76           | 42         | 41          |
| SUZ12        | 8        | 18       | 34       | 120         | 31           | 78         | 10          |

**B**

| PRC2 Protein | SUZ12 KNN | SUZ12 MLE | SUZ12 SVD | SUZ12 MinDet | SUZ12 MinProb | SUZ12 QRILC | SUZ12 Hybrid |
|--------------|-----------|-----------|-----------|--------------|---------------|-------------|--------------|
| AEBP2        | 163*      | 128*      | 56        | 2            | 3             | 1           | 4            |
| EED          | 3         | 1         | 3         | 22           | 5             | 3           | 22           |
| EZH2         | 10        | 125*      | 27        | 1            | 1             | 6           | 1            |
| JARID2       | 43        | 162*      | 61        | 3            | 4             | 7           | 3            |
| PCL          | 58        | 135*      | 63        | 4            | 2             | 2           | 2            |
| RbAp46       | 209*      | 173*      | 20        | 12           | 12            | 16          | 9            |
| SUZ12        | 2         | 6         | 6         | 41           | 26            | 22          | 18           |

**Supplemental Table S1.** Ranking of PRC2 proteins identified in the IPs. EZH2 (A) and SUZ12 (B) IPs were rank-ordered by  $q$ -value mean for each imputation method following consecutive iterations and the final position out of all protein identifications within each method was recorded.

\* designates non-significance at a  $q$ -value threshold cutoff  $< 0.05$ .
