# Supplementary material for: Multiple Imputation Approaches Applied to the Missing Value Problem in Bottom-Up Proteomics
Source: Int J Mol Sci. 2021 Sep 6;22(17):9650. doi: 10.3390/ijms22179650 (PMC8431783; doi:10.3390/ijms22179650)
Supplement: Supplementary file 1 [file ijms-22-09650-s001.zip]

Archive with 5 entries (5 files):
- Supplemental Figures_IJMS.pdf
- Table_S1.xlsx
- Table_S3.xlsx
- Table_S4.xlsx
- Table_S5.xlsx
