# Supplementary material for: Multiple Imputation Approaches Applied to the Missing Value Problem in Bottom-Up Proteomics
Source: Int J Mol Sci. 2021 Sep 6;22(17):9650. doi: 10.3390/ijms22179650 (PMC8431783; doi:10.3390/ijms22179650)
Supplement: Supplementary file 1 [file ijms-22-09650-s001.zip › Table_S1.xlsx]

## Sheet: Metrics_Amp_SimAmp
Simulated Data					Amputed Data							Amputed Data							Amputed Data							Amputed Data
					0.2: 0.2 MNAR: MAR (Low)							0.5:0.5 MNAR:MAR (Mid)							0.2:0.8 MNAR:MAR (High MAR)							0.8:0.2 MNAR:MAR (High MNAR)
Method	% M.V. GD	% M.V. HG	% Total M.V.	Sig Proteins	% M.V. GD	% M.V. HG	% Total M.V.	Sig Proteins	% Captured	Sig Proteins Lost	Sig Proteins Gain	% M.V. GD	% M.V. HG	% Total M.V.	Sig Proteins	% Captured	Sig Proteins Lost	Sig Proteins Gain	% M.V. GD	% M.V. HG	% Total M.V.	Sig Proteins	% Captured	Sig Proteins Lost	Sig Proteins Gain	% M.V. GD	% M.V. HG	% Total M.V.	Sig Proteins	% Captured	Sig Proteins Lost	Sig Proteins Gain
KNN	12.2	6.2	9.2	2570	MAR 1.6 MNAR 1.5 TOTAL 3.2	MAR 1.9 MNAR 1.6 TOTAL 3.5	MAR 1.7 MNAR 1.5 TOTAL 3.3	2033	79.1051	558	21	MAR 4.5 MNAR 4.3 TOTAL 8.8	MAR 4.2 MNAR 4.5 TOTAL 8.8	MAR 4.4 MNAR 4.4 TOTAL 8.8	1064	41.4008	1655	149	MAR 6.5 MNAR 1.5 TOTAL 8.0	MAR 7.0 MNAR 1.6 TOTAL 8.6	MAR 6.8 MNAR 1.5 TOTAL 8.3	1223	47.5875	1368	21	MAR 1.6 MNAR 7.0 TOTAL 8.6	MAR 1.7 MNAR 6.7 TOTAL 8.4	MAR 1.7 MNAR 6.8 TOTAL 8.5	1550	60.3113	1041	21
MLE				1794				1551	86.4548	282	39				1211	67.5028	844	261				1256	70.0111	583	45				1185	66.0535	631	22
SVD				2494				2109	84.563	400	15				1532	61.4274	1177	215				1601	64.1941	916	23				1623	65.0762	897	26
MinDet				2647				2199	83.0752	457	9				1281	48.3944	1484	118				1378	52.0589	1276	7				1236	46.6944	1423	12
MinProb				2527				2067	81.7966	481	21				1165	46.1021	1475	113				1273	50.3759	1267	13				1106	43.7673	1433	12
QRILC				2509				1986	79.155	531	8				1062	42.3276	1537	90				1166	46.4727	1347	4				1021	40.6935	1495	7
Hybrid				2537				2327	91.7225	262	52				2043	80.5282	795	301				2386	94.0481	254	103				1149	45.2897	1411	23
