# Supplementary material for: Multiple Imputation Approaches Applied to the Missing Value Problem in Bottom-Up Proteomics
Source: Int J Mol Sci. 2021 Sep 6;22(17):9650. doi: 10.3390/ijms22179650 (PMC8431783; doi:10.3390/ijms22179650)
Supplement: Supplementary file 1 [file ijms-22-09650-s001.zip › Table_S3.xlsx]

## Sheet: Supp_Table2_Combined_MDA_WCP.cs
* - Signficant, large stdev
** - Not signficant
*** - Not significant, large stdev
ProteinID	SYMBOL	Method	num_missing	a_missing	b_missing	logFC_mean	logFC_stdev	P.Value_mean	P.Value_stdev	qvalue_mean	qvalue_stdev	Method	logFC_mean	logFC_stdev	P.Value_mean	P.Value_stdev	qvalue_mean	qvalue_stdev	Method	logFC_mean	logFC_stdev	P.Value_mean	P.Value_stdev	qvalue_mean	qvalue_stdev	Method	logFC_mean	logFC_stdev	P.Value_mean	P.Value_stdev	qvalue_mean	qvalue_stdev	Method	logFC_mean	logFC_stdev	P.Value_mean	P.Value_stdev	qvalue_mean	qvalue_stdev	Method	logFC_mean	logFC_stdev	P.Value_mean	P.Value_stdev	qvalue_mean	qvalue_stdev
sp|P60709|ACTB_HUMAN	ACTB	KNN	0	0	0	-3.19195	0.00223018	2.43e-06	2.73e-07	0.000459925	6.72e-05	MLE	-3.17303	0.00594288	2.95e-06	1.29e-07	0.000558218	7.6e-05	SVD	-3.1852	0.0185538	3.54e-06	5.35e-07	0.00017389	9.51e-05	MinProb	-3.19315	0	4.49e-06	2.58e-08	0.000481731	7.1e-05	QRILC	-3.19315	0	5.19e-06	3.36e-08	0.000758099	0.000154285	Hybrid	-3.18778	0.00077751	2.38e-06	3.27e-08	0.000113766	1.35e-05
sp|P63261|ACTG_HUMAN	ACTG	KNN	1	0	1	-3.71698	0.0709277	4.05e-06	3.48e-06	0.000500525	0.000157967	MLE	-3.44063	0.299599	0.000382229	0.000771077	0.00200624	0.0021857	SVD	-3.271	0.105957	0.000261333	0.00119377	0.00112332	0.00350518	MinProb	-5.23646	0.183159	0.0141446	0.00412903	0.0196847	0.00396431	QRILC	-5.43884	0.362954	0.020401	0.0101015	0.0247661	0.00773426	Hybrid	-3.76342	0.00587068	4.84e-06	6.98e-07	0.000155302	1.64e-05
sp|P27695|APEX1_HUMAN	APEX1	KNN	0	0	0	-3.16724	0.00275392	7.99e-06	7.1e-07	0.00067513	4.47e-05	MLE	-3.14711	0.00496388	8.41e-06	3.7e-07	0.000748051	7.55e-05	SVD	-3.16204	0.0153941	1.13e-05	1.78e-06	0.000333282	0.000166117	MinProb	-3.16865	0	1.35e-05	5.58e-08	0.000756338	0.000108463	QRILC	-3.16865	0	1.55e-05	7.83e-08	0.00110326	0.000155168	Hybrid	-3.16154	0.0009302	7.64e-06	1.11e-07	0.000174161	1.17e-05
sp|O14497|ARI1A_HUMAN	ARI1A	KNN	2	2	0	5.52715	0.345299	6.88e-05	7.31e-05	0.00118912	0.000591009	MLE	5.01917	0.514455	0.0014464	0.00217495	0.00435934	0.00362711	SVD *	3.89715	0.757921	0.0276314	0.0133232	0.0376587	0.0167377	MinProb	6.7693	0.392441	7.48e-05	8.84e-05	0.00119263	0.000595383	QRILC	7.36823	0.568602	0.000534176	0.000593063	0.00330151	0.001781	Hybrid	5.84193	0.0111553	8.33e-07	8.76e-09	6.6e-05	1.43e-05
sp|P13073|COX41_HUMAN	COX41	KNN	0	0	0	3.97805	0.00755389	1.47e-06	1.8e-07	0.000398282	4.89e-05	MLE	3.96845	0.0107248	1.01e-06	9.27e-08	0.000319999	4e-05	SVD	4.04256	0.0200078	2.14e-06	8.04e-07	0.00012655	4.19e-05	MinProb	3.81379	7.58e-05	2.03e-06	1.12e-08	0.000323798	6.52e-05	QRILC	3.81379	0	2.38e-06	1.54e-08	0.000507499	0.000106715	Hybrid	3.92079	0.00612655	1.84e-06	5.87e-08	0.000100836	1.54e-05
sp|Q8N9N8|EIF1A_HUMAN	EIF1A	KNN **	3	0	3	-0.00914039	0.24603	0.612767	0.180897	0.270349	0.059105	MLE ***	0.0111246	1.23521	0.150624	0.178441	0.0790473	0.0727028	SVD *	1.64912	0.356216	0.0189642	0.0928007	0.0121532	0.0574338	MinProb	-3.85069	0.256476	0.000210434	0.00056886	0.00156351	0.00141131	QRILC	-4.92313	0.791391	0.0021531	0.004566	0.0049217	0.00586909	Hybrid	-4.13927	0.165845	1.23e-06	2.12e-06	7.02e-05	4.03e-05
sp|P21333|FLNA_HUMAN	FLNA	KNN	0	0	0	-3.00962	0	7.77e-07	1.01e-07	0.000378243	3.65e-05	MLE	-3.00948	0.000676194	9.73e-07	2.17e-08	0.000319999	4e-05	SVD	-3.00934	0.000936148	1.06e-06	2.11e-07	0.00012224	4.12e-05	MinProb	-3.00962	0	1.68e-06	1.65e-08	0.000323798	6.52e-05	QRILC	-3.00962	0	1.93e-06	1.97e-08	0.000507499	0.000106715	Hybrid	-3.00962	0	7.69e-07	1.28e-08	6.59e-05	1.43e-05
sp|Q8NBJ5|GT251_HUMAN	GT251	KNN	0	0	0	3.20364	0.0125104	1.02e-06	1.6e-07	0.000378243	3.65e-05	MLE	3.22098	0.00531294	1.19e-06	3.59e-08	0.000319999	4e-05	SVD	3.34661	0.0337739	3.04e-06	7.88e-07	0.000158933	3.84e-05	MinProb	3.19861	0	2.05e-06	1.61e-08	0.000323798	6.52e-05	QRILC	3.19861	0	2.37e-06	1.98e-08	0.000507499	0.000106715	Hybrid	3.20725	0.00116717	9.67e-07	1.23e-08	6.83e-05	1.44e-05
sp|P09429|HMGB1_HUMAN	HMGB1	KNN	3	0	3	-2.31155	0.479993	0.00516542	0.00930742	0.00891109	0.0101638	MLE ***	-0.268567	0.994245	0.231464	0.250727	0.111728	0.0988843	SVD *	-1.66397	0.322405	0.0217826	0.106422	0.0137867	0.0633658	MinProb	-7.18987	0.371675	4.67e-06	1.1e-05	0.000394649	0.000246657	QRILC	-8.09201	0.631895	0.000131088	0.000308054	0.0015222	0.00123274	Hybrid	-7.35752	0.0804605	4.25e-08	4.27e-08	2.54e-05	7.24e-06
sp|Q8IV08|PLD3_HUMAN	PLD3	KNN	3	3	0	2.79012	0.589998	0.00524769	0.0168545	0.00642241	0.0145829	MLE ***	0.424162	1.017	0.250044	0.273803	0.114834	0.0976603	SVD *	2.00022	0.419889	0.0297327	0.145457	0.0165482	0.0776622	MinProb	7.15727	0.447967	4.33e-05	0.000118073	0.000781557	0.00069629	QRILC	7.71033	1.0238	0.000260439	0.000627145	0.00202967	0.00177502	Hybrid	7.292	0.250548	6.91e-07	7.81e-07	5.65e-05	3.44e-05
sp|Q14108|SCRB2_HUMAN	SCRB2	KNN	0	0	0	3.32374	0.031928	8.98e-06	1.11e-06	0.000686331	5.23e-05	MLE	3.37848	0.0072759	9e-06	7.15e-07	0.00074888	7.56e-05	SVD	3.49507	0.0321796	5.27e-06	1.23e-06	0.000240245	0.000191944	MinProb	3.29722	0	2.05e-05	7.61e-08	0.000857952	0.000117153	QRILC	3.29722	0	2.35e-05	1.1e-07	0.00123862	0.000134339	Hybrid	3.34272	0.00647197	6.06e-06	4.38e-07	0.000168771	1.31e-05
sp|P31040|SDHA_HUMAN	SDHA	KNN	0	0	0	2.24128	0.000863113	7.64e-06	7.32e-07	0.000674382	4.36e-05	MLE	2.24565	0.00310071	9.25e-06	3.41e-07	0.000749961	7.54e-05	SVD	2.24199	0.00177481	9.9e-06	1.68e-06	0.000314239	0.000142595	MinProb	2.24131	0	1.42e-05	1.06e-07	0.000758342	0.000108308	QRILC	2.24131	0	1.6e-05	1.25e-07	0.00110326	0.000155168	Hybrid	2.24131	0	7.57e-06	9.88e-08	0.000174139	1.17e-05
sp|O60232|SSA27_HUMAN	SSA27	KNN **	3	0	3	-0.237442	0.241196	0.21097	0.143589	0.123299	0.0599634	MLE ***	0.190237	1.1478	0.131518	0.16503	0.0737288	0.0752053	SVD *	2.32258	0.49365	0.0222251	0.108855	0.0133474	0.0644222	MinProb	-3.32826	0.387547	0.000930417	0.00150682	0.00329897	0.00312459	QRILC	-3.87303	0.647853	0.00133507	0.0033145	0.00393931	0.00443429	Hybrid	-3.37745	0.111837	1.52e-06	2.42e-06	7.96e-05	4.1e-05
sp|P23381|SYWC_HUMAN	SYWC	KNN	0	0	0	-3.72216	0.018859	7.53e-07	1.4e-07	0.000378243	3.65e-05	MLE	-3.67787	0.00710679	9.16e-07	4.38e-08	0.000319999	4e-05	SVD	-3.54251	0.0378629	1.64e-06	3.56e-07	0.00012254	4.11e-05	MinProb	-3.73641	0	1.45e-06	9.49e-09	0.000323798	6.52e-05	QRILC	-3.73641	0	1.69e-06	1.24e-08	0.000507499	0.000106715	Hybrid	-3.71156	0.00610092	7.53e-07	2.85e-08	6.59e-05	1.43e-05
sp|P54577|SYYC_HUMAN	SYYC	KNN	0	0	0	-2.37594	0.000979073	7.37e-06	7.48e-07	0.000674382	4.36e-05	MLE	-2.37208	0.00301513	8.36e-06	2.58e-07	0.000747959	7.57e-05	SVD	-2.37551	0.00160114	9.74e-06	1.61e-06	0.000314184	0.000142092	MinProb	-2.3761	0	1.34e-05	9.03e-08	0.000756338	0.000108463	QRILC	-2.3761	0	1.52e-05	1.08e-07	0.00110326	0.000155168	Hybrid	-2.3761	0	7.23e-06	9.15e-08	0.000174119	1.18e-05
sp|P09758|TACD2_HUMAN	TACD2	KNN	0	0	0	3.07134	0.0155828	4.56e-06	3.99e-07	0.000590013	6.52e-05	MLE	3.09877	0.00654646	4.26e-06	3.2e-07	0.000600885	7.87e-05	SVD	3.24931	0.0363417	1.76e-06	4.93e-07	0.000145743	0.00015335	MinProb	3.06294	0	8.22e-06	4.09e-08	0.000625443	0.000107281	QRILC	3.06294	0	9.47e-06	5.45e-08	0.00092212	0.000160123	Hybrid	3.07131	0.0081329	4.22e-06	1.39e-07	0.000146614	1.25e-05
sp|Q8NFQ8|TOIP2_HUMAN	TOIP2	KNN	0	0	0	4.33711	0.0177992	4.9e-06	4.06e-07	0.000609559	4.19e-05	MLE	4.36177	0.00829977	4.3e-06	1.03e-07	0.000599777	7.7e-05	SVD	4.46431	0.0299374	7e-06	1.11e-06	0.000247892	0.00013872	MinProb	4.25898	0	7.61e-06	3.06e-08	0.000622373	0.000109537	QRILC	4.25898	0	8.88e-06	4.57e-08	0.00092212	0.000160123	Hybrid	4.33423	0.00407054	5e-06	1.27e-07	0.000159922	1.26e-05
sp|Q15819|UB2V2_HUMAN	UB2V2	KNN ***	3	0	3	-0.616311	0.189528	0.103621	0.0754139	0.0756274	0.0397466	MLE ***	-0.0486549	1.23036	0.244907	0.324012	0.110313	0.118923	SVD	1.07632	0.249597	0.00996792	0.0478452	0.00913703	0.0366608	MinProb	-4.4476	0.3904	9.09e-05	0.000271609	0.00108237	0.000984205	QRILC	-5.41013	0.621337	0.000965535	0.00230447	0.00371264	0.00333072	Hybrid	-4.70065	0.120665	9.19e-07	2.57e-06	5.77e-05	4.32e-05
sp|Q9Y3C8|UFC1_HUMAN	UFC1	KNN ***	3	0	3	-0.597294	0.227132	0.103521	0.184046	0.0634236	0.0801719	MLE ***	0.147401	0.997814	0.237275	0.287621	0.11168	0.105911	SVD *	0.649834	0.164941	0.0127449	0.048976	0.0151235	0.0363214	MinProb	-4.92982	0.300349	1.89e-05	4.74e-05	0.000611302	0.000482131	QRILC	-5.66002	0.554138	0.0012595	0.00201423	0.00418004	0.00389221	Hybrid	-5.18182	0.173438	2.01e-06	4.91e-06	6.78e-05	7.51e-05
