# Supplementary material for: Multiple Imputation Approaches Applied to the Missing Value Problem in Bottom-Up Proteomics
Source: Int J Mol Sci. 2021 Sep 6;22(17):9650. doi: 10.3390/ijms22179650 (PMC8431783; doi:10.3390/ijms22179650)
Supplement: Supplementary file 1 [file ijms-22-09650-s001.zip › Table_S4.xlsx]

## Sheet: Supp_Table3_Combined_EZH2toIgG.
* - Signficant, large stdev
** - Not signficant
*** - Not significant, large stdev
ProteinID	SYMBOL	Method	num_missing	a_missing	b_missing	logFC_mean	logFC_stdev	P.Value_mean	P.Value_stdev	qvalue_mean	qvalue_stdev	Method	logFC_mean	logFC_stdev	P.Value_mean	P.Value_stdev	qvalue_mean	qvalue_stdev	Method	logFC_mean	logFC_stdev	P.Value_mean	P.Value_stdev	qvalue_mean	qvalue_stdev	Method	logFC_mean	logFC_stdev	P.Value_mean	P.Value_stdev	qvalue_mean	qvalue_stdev	Method	logFC_mean	logFC_stdev	P.Value_mean	P.Value_stdev	qvalue_mean	qvalue_stdev	Method	logFC_mean	logFC_stdev	P.Value_mean	P.Value_stdev	qvalue_mean	qvalue_stdev
sp|Q96SW2|CRBN_HUMAN	CRBN	KNN	2	0	2	-4.829	0.1131	7.57e-06	1.24e-05	7.05e-05	4.95e-05	MLE	-5.353	0.4379	4.7e-05	0.000105555	0.000124891	0.000151189	SVD	-3.173	0.7001	0.0246751	0.0108136	0.0147052	0.00653116	MinProb	-8.257	1.4828	0.00261324	0.00930385	0.00425796	0.0107035	QRILC	-10.538	0.7335	0.000372142	0.000428694	0.00179039	0.00133715	Hybrid	-5.818	0.0115	5.53e-07	2.4e-08	8.22e-06	1.77e-06
sp|Q5M775|CYTSB_HUMAN	CYTSB	KNN *	3	0	3	1.056	0.5829	0.0585374	0.0500795	0.0316601	0.0287831	MLE *	0.782	2.3576	0.137004	0.250432	0.0325227	0.0526575	SVD	1.351	0.4203	0.0105524	0.0251706	0.00615326	0.0106981	MinProb	-7.689	1.4774	0.00143049	0.00334018	0.00372443	0.00607786	QRILC	-10.049	0.7834	9.44e-05	0.000227058	0.00059653	0.000735291	Hybrid	-5.951	0.1245	3.86e-07	1.64e-07	6.63e-06	1.85e-06
sp|Q16531|DDB1_HUMAN	DDB1	KNN	0	0	0	-4.943	0.1385	2.7e-06	1.41e-06	5.49e-05	1.53e-05	MLE	-4.793	0.0546	5.12e-06	5.4e-07	6.35e-05	2.65e-05	SVD	-4.702	0.0973	8.45e-06	2.34e-05	6.84e-05	7.96e-05	MinProb	-5.797	0.0313	1.63e-05	1.15e-06	0.000493604	0.000123128	QRILC	-6.268	0.0072	1.53e-05	8.77e-07	0.000353989	5.77e-05	Hybrid	-5.564	0	1.63e-06	6.62e-08	1.2e-05	2.45e-06
sp|P17844|DDX5_HUMAN	DDX5	KNN	0	0	0	4.085	0.0375	4.42e-06	1.64e-06	5.89e-05	1.53e-05	MLE	4.265	0.122	7.27e-06	3.84e-06	7.03e-05	3.25e-05	SVD	4.239	0.5511	3.96e-06	3.9e-06	6.2e-05	4.26e-05	MinProb	4.063	0.0033	5.42e-05	3.74e-06	0.000776143	0.000205344	QRILC	4.062	0	6.18e-05	4.8e-06	0.000709835	0.000101688	Hybrid	4.081	0	2.64e-06	1.31e-07	1.6e-05	3.46e-06
sp|O75530|EED_HUMAN	EED	KNN	0	0	0	7.593	0.1121	1.64e-05	4.56e-06	0.000105003	2.9e-05	MLE	7.604	0.0708	2.92e-06	6.38e-07	5.14e-05	2.16e-05	SVD	7.749	0.3687	0.000199519	7.93e-05	0.000469601	0.000153571	MinProb	7.044	0.0168	1.2e-05	1.16e-06	0.000450739	0.000122968	QRILC	6.974	0	1.11e-05	5.97e-07	0.000311992	4.91e-05	Hybrid	7.105	0	1.56e-06	8.76e-08	1.19e-05	2.41e-06
sp|Q15910|EZH2_HUMAN	EZH2	KNN	3	3	0	5.828	0.7006	6.5e-05	0.000173036	0.000142198	0.000222744	MLE	3.752	2.2259	0.042004	0.111162	0.0136005	0.0265212	SVD	6.783	1.1645	2.84e-05	7.88e-05	0.000146828	0.000210388	MinProb	11.204	1.1138	0.000438516	0.00107639	0.00165494	0.00287937	QRILC	11.651	1.5199	0.000389291	0.000932031	0.00126667	0.00196165	Hybrid	10.702	0.7218	1.09e-06	2.43e-06	7.59e-06	1.03e-05
sp|P17096|HMGA1_HUMAN	HMGA1	KNN	2	0	2	-6.185	0.2721	7.32e-05	0.000253696	0.00016168	0.000275654	MLE	-7.197	0.7418	1.47e-05	2.23e-05	7.37e-05	6.33e-05	SVD	-4.479	1.169	0.0282845	0.0116764	0.0158828	0.0062344	MinProb	-9.749	0.8891	0.000245077	0.000587321	0.00111298	0.00119493	QRILC	-11.411	0.5853	5.85e-05	8.98e-05	0.000571199	0.00055528	Hybrid	-6.733	0.0116	2.66e-06	2.3e-07	1.61e-05	3.5e-06
sp|O14979|HNRDL_HUMAN	HNRDL	KNN	0	0	0	-4.375	0.1049	3.45e-06	2.36e-06	5.69e-05	1.58e-05	MLE	-4.043	0.0755	1.03e-05	1.93e-06	8.23e-05	4.15e-05	SVD	-4.518	0.32	4.74e-05	0.000183359	0.000123707	0.000269111	MinProb	-4.619	0.0101	2.72e-05	1.83e-06	0.000566613	0.000128815	QRILC	-4.648	0	3.02e-05	2.36e-06	0.00047293	8.31e-05	Hybrid	-4.574	0	1.23e-06	6.15e-08	1.06e-05	2.29e-06
sp|P35527|K1C9_HUMAN	K1C9	KNN	1	0	1	-6.683	0.063	7.26e-06	3.61e-06	6.88e-05	2.22e-05	MLE	-6.876	0.3523	3.34e-05	7.91e-05	9.84e-05	8.07e-05	SVD	-5.663	0.4909	0.00209623	0.000981551	0.00229144	0.000948134	MinProb	-9.323	0.6618	0.000130462	0.000229332	0.000968485	0.000971048	QRILC	-10.625	0.508	0.000314515	0.000449085	0.00156364	0.00151395	Hybrid	-7.391	0.0115	5.26e-07	3.77e-08	8.19e-06	1.76e-06
sp|P04264|K2C1_HUMAN	K2C1	KNN	0	0	0	-6.418	0.0978	5.35e-07	3e-07	2.13e-05	8.32e-06	MLE	-6.407	0.0567	6.5e-07	1.16e-07	2.49e-05	1.03e-05	SVD	-6.245	0.1347	3.1e-06	1.16e-05	4.13e-05	4.8e-05	MinProb	-7.062	0.0258	3.44e-06	2.14e-07	0.000279203	9.24e-05	QRILC	-7.355	0	3.82e-06	2.63e-07	0.00022137	4.52e-05	Hybrid	-6.868	0	1.86e-07	8.44e-09	5.26e-06	1.43e-06
sp|Q9Y2X3|NOP58_HUMAN	NOP58	KNN	0	0	0	5.274	0.1394	8.33e-06	2.36e-06	7.53e-05	2.1e-05	MLE	5.193	0.0444	9.29e-06	1.86e-06	7.94e-05	3.87e-05	SVD	5.794	0.1161	5.56e-06	4.72e-06	6.96e-05	5.14e-05	MinProb	4.151	0.0263	0.000171538	2.07e-05	0.00131773	0.000240854	QRILC	4.037	0	0.000242335	1.12e-05	0.00153272	0.000220573	Hybrid	4.347	0	1.99e-05	7.07e-07	5.72e-05	1.05e-05
sp|P23284|PPIB_HUMAN	PPIB	KNN	3	0	3	-1.791	0.8632	0.00326861	0.00411766	0.00292959	0.00247863	MLE *	-0.902	1.9897	0.117669	0.218558	0.0415434	0.0695999	SVD	-1.951	0.298	0.000805554	0.00171944	0.00112793	0.00206967	MinProb	-9.124	1.6324	0.0019031	0.00380295	0.00450945	0.00695141	QRILC	-11.723	0.7901	1.92e-05	2.86e-05	0.000337481	0.00026715	Hybrid	-7.886	0.1647	8.18e-08	7.97e-08	3.28e-06	2.07e-06
sp|Q92804|RBP56_HUMAN	RBP56	KNN	0	0	0	-3.541	0.1844	4.4e-05	3.14e-05	0.000179159	9.9e-05	MLE	-3.527	0.0622	4.67e-05	8.24e-06	0.000177066	7.6e-05	SVD	-3.131	0.1007	9.06e-05	0.000183923	0.000276282	0.000396436	MinProb	-5.076	0.0325	2.87e-05	2.31e-06	0.000573559	0.000127414	QRILC	-5.559	0.0383	1.87e-05	1.31e-06	0.000374602	6.66e-05	Hybrid	-4.915	0.0032	1.71e-06	6.56e-08	1.21e-05	2.49e-06
sp|P22626|ROA2_HUMAN	ROA2	KNN	0	0	0	-3.996	0.1121	8.15e-06	7.6e-06	6.95e-05	2.78e-05	MLE	-3.731	0.0658	1.99e-05	6.39e-06	0.000113865	5.43e-05	SVD	-4.062	0.2588	3.45e-05	0.000127661	0.000115958	0.000197241	MinProb	-4.153	0.0074	5.5e-05	3.64e-06	0.000776501	0.000205257	QRILC	-4.162	0	6.18e-05	4.57e-06	0.000709835	0.000101688	Hybrid	-4.104	0	3.26e-06	1.45e-07	1.85e-05	3.91e-06
sp|Q15459|SF3A1_HUMAN	SF3A1	KNN	2	2	0	7.821	0.3285	7.64e-05	0.00035834	9.76e-05	0.000362173	MLE	7.223	0.6614	0.00016595	0.000429462	0.00029992	0.000597267	SVD	8.177	0.8542	0.00162357	0.00794244	0.000939895	0.00433739	MinProb	10.085	1.1106	0.000817905	0.00117549	0.00305783	0.00262196	QRILC	10.492	0.8976	0.00161017	0.00212849	0.00471713	0.00448679	Hybrid	7.823	0	6.82e-07	4.02e-08	8.95e-06	1.78e-06
sp|Q15428|SF3A2_HUMAN	SF3A2	KNN	1	1	0	7.006	0.1148	1.4e-05	1.3e-05	9.32e-05	4.2e-05	MLE	7.174	0.4062	2.18e-05	6.65e-05	8.57e-05	9.53e-05	SVD	7.516	0.5251	0.000380561	0.00181667	0.000495519	0.00198221	MinProb	7.127	0.8279	0.00122986	0.0019051	0.00344387	0.00386907	QRILC	7.667	0.7191	0.0029901	0.00418656	0.00648023	0.00573975	Hybrid	6.385	0	9.92e-07	4.62e-08	9.84e-06	2.08e-06
sp|Q12874|SF3A3_HUMAN	SF3A3	KNN	0	0	0	6.956	0.2141	1.99e-07	4.9e-08	1.54e-05	6.28e-06	MLE	6.904	0.0555	3.58e-07	5.59e-08	2.23e-05	1.01e-05	SVD	7.857	0.2335	1.43e-07	2.21e-07	1.67e-05	2.34e-05	MinProb	6.187	0.0129	5.84e-06	5.2e-07	0.000323912	0.000102856	QRILC	6.126	0	7.33e-06	5.62e-07	0.00027218	5.22e-05	Hybrid	6.323	0	2.94e-07	1.29e-08	6.13e-06	1.42e-06
sp|P23246|SFPQ_HUMAN	SFPQ	KNN	0	0	0	-4.642	0.0827	5.4e-06	3.01e-06	6.18e-05	1.79e-05	MLE	-4.363	0.098	1.25e-05	3.85e-06	8.8e-05	3.63e-05	SVD	-4.632	0.2275	2.63e-05	8.61e-05	0.000107533	0.000164592	MinProb	-5.037	0.0114	2.56e-05	1.49e-06	0.000566613	0.000128815	QRILC	-5.113	0	2.71e-05	1.83e-06	0.000456253	8.05e-05	Hybrid	-4.954	0	2.06e-06	7.8e-08	1.39e-05	2.83e-06
sp|Q14683|SMC1A_HUMAN	SMC1A	KNN	0	0	0	4.165	0.1076	1.22e-05	6.18e-06	8.61e-05	2.67e-05	MLE	3.521	0.0688	8.71e-05	1.78e-05	0.000251415	0.000108512	SVD	4.506	0.1552	1.37e-05	3.02e-05	9.48e-05	0.000123772	MinProb	1.448	0.0655	0.0194845	0.00412703	0.029142	0.00690636	QRILC **	0.542	0.04077	0.291747	0.0388866	0.220727	0.0344779	Hybrid	2.239	0.0475	0.00330075	0.000331967	0.00289236	0.000589547
sp|Q15022|SUZ12_HUMAN	SUZ12	KNN	1	1	0	8.362	0.2271	5.66e-06	4.48e-06	6.41e-05	2.39e-05	MLE	8.134	0.5597	4.19e-05	0.000106532	0.000129425	0.000209566	SVD	8.833	0.4723	0.00035657	0.00166753	0.000484835	0.0018635	MinProb	8.589	0.6455	0.000455705	0.000645854	0.00195665	0.00168447	QRILC	9.01	0.71458	0.00195013	0.00321671	0.00471156	0.00471641	Hybrid	8.003	0	9.5e-07	5.88e-08	9.84e-06	2.08e-06
sp|Q9UKN8|TF3C4_HUMAN	TF3C4	KNN	0	0	0	10.765	0.0431	1.35e-07	1.03e-07	1.36e-05	6.89e-06	MLE	10.431	0.0988	2.83e-08	9.1e-09	4.25e-06	2.19e-06	SVD	10.806	0.1184	1.77e-07	2.82e-07	1.29e-05	1.2e-05	MinProb	8.833	0.0348	1.35e-06	2.8e-07	0.000210427	7.92e-05	QRILC	8.463	0.03284	1.23e-06	1.1e-07	0.000153458	4.39e-05	Hybrid	10.586	0.0464	5.26e-08	1.73e-08	2.78e-06	1.21e-06
