# Supplementary material for: Multiple Imputation Approaches Applied to the Missing Value Problem in Bottom-Up Proteomics
Source: Int J Mol Sci. 2021 Sep 6;22(17):9650. doi: 10.3390/ijms22179650 (PMC8431783; doi:10.3390/ijms22179650)
Supplement: Supplementary file 1 [file ijms-22-09650-s001.zip › Table_S5.xlsx]

## Sheet: Supp_Table4_Combined_SUZ12toIgG
* - Signficant, large stdev
** - Not signficant
*** - Not significant, large stdev
ProteinID	SYMBOL	Method	num_missing	a_missing	b_missing	logFC_mean	logFC_stdev	P.Value_mean	P.Value_stdev	qvalue_mean	qvalue_stdev	Method	logFC_mean	logFC_stdev	P.Value_mean	P.Value_stdev	qvalue_mean	qvalue_stdev	Method	logFC_mean	logFC_stdev	P.Value_mean	P.Value_stdev	qvalue_mean	qvalue_stdev	Method	logFC_mean	logFC_stdev	P.Value_mean	P.Value_stdev	qvalue_mean	qvalue_stdev	Method	logFC_mean	logFC_stdev	P.Value_mean	P.Value_stdev	qvalue_mean	qvalue_stdev	Method	logFC_mean	logFC_stdev	P.Value_mean	P.Value_stdev	qvalue_mean	qvalue_stdev
sp|Q6ZN18|AEBP2_HUMAN	AEBP2	KNN ***	3	3	0	0.858909	1.01901	0.196307	0.223607	0.0869893	0.0824469	MLE ***	1.28722	1.74846	0.146292	0.263218	0.0687542	0.093677	SVD *	5.51892	1.10852	0.0234617	0.114935	0.0153636	0.0751245	MinProb	10.9638	0.382323	4.29e-06	6.12e-06	6.71e-05	6.4e-05	QRILC	11.3179	0.657704	7.9e-06	1.74e-05	0.000157698	0.000169335	Hybrid	10.4403	0.0498701	7.91e-09	1.87e-09	2.99e-07	6.04e-08
sp|Q10570|CPSF1_HUMAN	CPSF1	KNN *	3	3	0	0.884821	0.238468	0.0355412	0.0248417	0.0343297	0.016806	MLE ***	0.84424	1.76751	0.163117	0.250638	0.0813575	0.0949113	SVD	2.92429	0.455977	0.000601517	0.00285572	0.00206261	0.00897241	MinProb	8.2541	0.508735	3.83e-05	7.97e-05	0.000275834	0.000424476	QRILC	8.54679	0.808984	6.96e-05	0.000157413	0.000571784	0.000974677	Hybrid	7.67724	0.114998	9.27e-08	8.31e-08	1.34e-06	8.55e-07
sp|Q9P2I0|CPSF2_HUMAN	CPSF2	KNN	1	1	0	4.83894	0.329074	0.000529978	0.00256204	0.00162976	0.00745798	MLE	4.97206	0.36977	0.000178492	0.00063192	0.000752674	0.00152716	SVD	3.73592	0.453483	0.0129841	0.00613661	0.0285358	0.0126896	MinProb	5.40393	0.303306	0.000201829	0.000236286	0.00117921	0.0011253	QRILC	5.54135	0.524298	0.000938111	0.00218827	0.00302579	0.00468157	Hybrid	4.74178	0	4.56e-06	1.13e-07	2.09e-05	7.33e-07
sp|Q16531|DDB1_HUMAN	DDB1	KNN	0	0	0	-3.05705	0.0634361	0.000109651	2.48e-05	0.000986462	0.000438843	MLE	-3.0824	0.0743613	0.000128388	2.84e-05	0.00121435	0.000390141	SVD	-3.576	0.119812	8.21e-05	1.81e-05	0.0008176	0.000575865	MinProb	-3.57832	0	0.000119779	3.48e-06	0.000903981	0.000150369	QRILC	-3.57832	0	0.000155222	5.68e-06	0.00128532	0.00016965	Hybrid	-3.49632	0	3.95e-05	7.71e-07	0.000147169	3.08e-06
sp|P15924|DESP_HUMAN	DESP	KNN ***	3	0	3	-0.845074	0.600679	0.0718074	0.0516097	0.0551902	0.0309038	MLE ***	-0.19569	1.43881	0.227573	0.24175	0.113401	0.106076	SVD	-2.47778	0.64003	0.00118969	0.00537391	0.00326173	0.0124131	MinProb	-7.98699	0.458235	1.38e-05	2.12e-05	0.000163017	0.000190173	QRILC	-8.65257	0.979658	0.000294391	0.000633963	0.00148517	0.00212562	Hybrid	-7.28048	0.132646	2.71e-07	3.42e-07	2.84e-06	1.97e-06
sp|O75530|EED_HUMAN	EED	KNN	0	0	0	7.99459	0.0197096	2.2e-06	9.98e-07	5.67e-05	3.17e-05	MLE	8.13436	0.115233	1.36e-06	2.46e-07	5.79e-05	1.63e-05	SVD	7.95303	0.0279045	4.6e-06	7.29e-07	9.75e-05	2.4e-05	MinProb	7.88204	0	4.03e-06	1.06e-07	8.88e-05	1.47e-05	QRILC	7.88204	0	5.56e-06	1.86e-07	0.000175819	5.48e-05	Hybrid	7.93182	0	1.74e-06	9.07e-08	9.85e-06	5.66e-07
sp|A6NHQ4|EPOP_HUMAN	EPOP	KNN **	3	3	0	-0.0748456	0.345541	0.472495	0.254883	0.189768	0.0835571	MLE ***	0.953516	1.38592	0.267245	0.279745	0.125426	0.114532	SVD *	4.38677	0.907219	0.0328073	0.160707	0.0180688	0.088057	MinProb	9.81875	0.567818	9.27e-06	2.07e-05	0.000119873	0.000194169	QRILC	10.402	1.00814	5.14e-05	7.3e-05	0.000498498	0.000467414	Hybrid	9.28778	0.0793157	2.55e-08	4.88e-09	6.12e-07	1.01e-07
sp|Q92800|EZH1_HUMAN	EZH1	KNN **	3	3	0	0.312912	0.374333	0.329636	0.277034	0.152452	0.0996378	MLE ***	1.74012	1.65816	0.11626	0.222146	0.0580024	0.0840746	SVD *	3.63646	0.740406	0.0360322	0.176499	0.0189747	0.0924815	MinProb	9.07192	0.545642	9.59e-06	1.56e-05	0.000116447	0.000111495	QRILC	9.28857	0.579208	7.58e-05	0.000226212	0.000584713	0.0011524	Hybrid	8.42081	0.0986124	2.32e-08	1.65e-08	5.68e-07	2.92e-07
sp|Q15910|EZH2_HUMAN	EZH2	KNN	3	3	0	3.65754	1.54156	0.000232389	0.000451686	0.00114831	0.00131674	MLE ***	2.10766	1.7832	0.144541	0.246367	0.0675904	0.0873896	SVD	6.87071	1.53869	0.00258669	0.0126708	0.00428997	0.0209307	MinProb	12.535	0.550505	2.82e-06	6.14e-06	4.75e-05	5.58e-05	QRILC	12.9929	0.840769	1.63e-05	2.58e-05	0.000235039	0.000269564	Hybrid	11.9088	0.0380511	5.1e-09	7.2e-10	2.5e-07	4.26e-08
sp|O14979|HNRDL_HUMAN	HNRDL	KNN	0	0	0	-1.5051	0.107746	0.000684803	0.000367179	0.0027756	0.00125442	MLE	-1.46226	0.103276	0.00194934	0.00120114	0.00584694	0.00230824	SVD	-1.80347	0.109728	0.00026493	6.28e-05	0.00173535	0.000792348	MinProb	-1.83066	0	0.00113999	5.83e-05	0.00451301	0.000736607	QRILC	-1.83066	0	0.00144777	9.4e-05	0.00606875	0.000734461	Hybrid	-1.82405	0	0.000112823	4.4e-06	0.000341771	1.33e-05
sp|Q92833|JARD2_HUMAN	JARD2	KNN	3	3	0	2.03038	1.31401	0.0136081	0.0427291	0.00850543	0.0227983	MLE ***	0.920169	1.35951	0.217731	0.315688	0.09833	0.116484	SVD *	6.29224	1.2791	0.0322656	0.158068	0.0179181	0.0876948	MinProb	11.666	0.35003	4.86e-06	4.84e-06	7.68e-05	5.46e-05	QRILC	12.4438	0.956966	2.21e-05	4.45e-05	0.000247526	0.000321146	Hybrid	11.3657	0.102123	5.89e-09	6.64e-09	2.8e-07	1.17e-07
sp|P35527|K1C9_HUMAN	K1C9	KNN	1	0	1	-3.20598	0.119877	1.66e-05	2.11e-05	0.000218634	0.000261374	MLE	-3.19902	0.373706	0.00232223	0.010464	0.00341826	0.0109178	SVD	-2.97063	0.170059	0.000779438	0.00177148	0.00359459	0.00627843	MinProb	-4.73593	0.249966	0.00940725	0.00461912	0.0191563	0.00786101	QRILC *	-5.06687	0.622319	0.0192344	0.0152583	0.0318506	0.0195656	Hybrid	-3.26159	0	2.66e-06	1.08e-07	1.35e-05	6.16e-07
sp|P04264|K2C1_HUMAN	K2C1	KNN	1	0	1	-4.22268	0.0849192	6.92e-06	2.91e-06	0.000111948	6.07e-05	MLE	-3.95248	0.316729	0.000217383	0.000445358	0.00118156	0.00156984	SVD	-4.84752	0.407159	0.000369166	0.00139978	0.00188476	0.00578722	MinProb	-6.63775	0.393711	0.0125548	0.00561604	0.0226708	0.007211	QRILC	-6.95371	0.471975	0.0191509	0.00858419	0.0326191	0.0106474	Hybrid	-4.57494	0	2.81e-06	4.5e-08	1.38e-05	4.93e-07
sp|Q9Y483|MTF2_HUMAN	MTF2	KNN *	3	3	0	2.44018	1.22594	0.0319169	0.107714	0.0129298	0.0415629	MLE ***	1.35173	1.52453	0.17439	0.258071	0.0782931	0.0968888	SVD *	6.52985	1.32924	0.0338141	0.165653	0.0182702	0.0894195	MinProb	12.0535	0.57506	2.38e-06	3.26e-06	5.71e-05	3.89e-05	QRILC	12.6764	0.952363	8.78e-06	1.46e-05	0.000162581	0.000141446	Hybrid	11.49	0.056732	5.98e-09	4.36e-09	2.77e-07	9.52e-08
sp|P06748|NPM_HUMAN	NPM	KNN	0	0	0	2.91133	0.0462894	5.25e-05	1.49e-05	0.000615987	0.000250607	MLE	2.89252	0.0788493	9.98e-05	2.03e-05	0.00105853	0.000315074	SVD	2.65082	0.0660989	0.000142226	3.92e-05	0.00104979	0.000348794	MinProb	2.64122	0	0.000382815	1.36e-05	0.00212148	0.00037658	QRILC	2.64122	0	0.000487601	2.19e-05	0.00286634	0.000375177	Hybrid	2.6678	0	5.6e-05	2.9e-07	0.000193046	4.1e-06
sp|P23284|PPIB_HUMAN	PPIB	KNN **	3	0	3	0.0284483	1.05682	0.324958	0.243411	0.147137	0.086615	MLE ***	-0.101642	1.71977	0.214194	0.314628	0.101145	0.126324	SVD	-0.814908	0.237804	0.00945034	0.0172607	0.0195445	0.0224865	MinProb	-6.02226	0.4589	0.00025007	0.000532169	0.001125	0.00179517	QRILC	-6.8255	0.950519	0.000731865	0.00156729	0.00272718	0.00449525	Hybrid	-5.43386	0.063066	2.01e-07	5.88e-08	2.5e-06	5.38e-07
sp|Q09028|RBBP4_HUMAN	RBBP4	KNN	0	0	0	5.05439	0.0399942	4.6e-07	1.43e-07	4e-05	7.79e-06	MLE	5.15229	0.0640782	1.11e-06	2.02e-07	5.79e-05	1.63e-05	SVD	4.92573	0.0510058	1.41e-06	4.41e-07	6.04e-05	1.85e-05	MinProb	4.9143	0	6.15e-06	3.02e-07	9.86e-05	1.69e-05	QRILC	4.9143	0	8.9e-06	5.48e-07	0.000190134	5.03e-05	Hybrid	4.93201	0	3.74e-07	6.66e-09	3.6e-06	2.3e-07
sp|Q16576|RBBP7_HUMAN	RBBP7	KNN **	3	3	0	0.456116	0.464928	0.269909	0.185805	0.126105	0.0677586	MLE ***	0.860877	1.3476	0.201484	0.250275	0.103111	0.10928	SVD	2.82131	0.45016	0.00141675	0.00656598	0.00364741	0.0144694	MinProb	8.13857	0.554912	3.18e-05	5.73e-05	0.000300406	0.00043096	QRILC	8.76798	0.782051	0.00035728	0.000666468	0.00166477	0.00230568	Hybrid	7.61404	0.112487	1.52e-07	9.82e-08	2.03e-06	7.1e-07
sp|P08621|RU17_HUMAN	RU17	KNN	0	0	0	-1.51667	0.0539513	0.000911094	7.25e-05	0.00330095	0.000918652	MLE	-1.55247	0.0887401	0.00229456	0.000935267	0.00645987	0.00212459	SVD	-1.99913	0.107153	0.000281426	0.000132274	0.00182933	0.00120506	MinProb	-2.01994	0	0.000891173	4.06e-05	0.0037931	0.000608448	QRILC	-2.01994	0	0.00112913	6.53e-05	0.00510561	0.000613502	Hybrid	-1.93945	0	0.000202119	3.45e-06	0.000512523	7.36e-06
sp|P62306|RUXF_HUMAN	RUXF	KNN	0	0	0	-3.49146	0.0195093	7.42e-05	1.05e-05	0.000756986	0.000183996	MLE	-3.42166	0.0413212	7.44e-05	1.35e-05	0.000890157	0.000272469	SVD	-3.64655	0.0511008	7.1e-05	1.2e-05	0.000749654	0.000343117	MinProb	-3.65973	0.00383921	0.00015876	4.42e-06	0.00107868	0.000157065	QRILC	-3.66397	0	0.000205419	6.3e-06	0.00153288	0.000184344	Hybrid	-3.50494	0	4.31e-05	8.75e-07	0.000155531	3.83e-06
sp|Q15022|SUZ12_HUMAN	SUZ12	KNN	1	1	0	9.65113	0.105379	1.06e-06	5.82e-07	4.79e-05	2.11e-05	MLE	9.18847	0.489844	0.000116619	0.000201494	0.000904515	0.00123588	SVD	9.22438	0.309682	0.00017525	0.000802175	0.000957967	0.00391613	MinProb	10.9614	0.214346	0.000197823	0.000116168	0.00123487	0.000534372	QRILC	11.1445	0.441697	0.000503494	0.000695193	0.00257821	0.0023143	Hybrid	9.96049	0	8.48e-07	5.14e-08	5.98e-06	4.16e-07
sp|Q9UKN8|TF3C4_HUMAN	TF3C4	KNN	0	0	0	5.74788	0.0664468	2.32e-06	1.14e-06	5.79e-05	3.24e-05	MLE	6.01334	0.11209	1.5e-06	1.03e-06	6.26e-05	2.69e-05	SVD	5.63761	0.106478	3.46e-06	9.34e-07	9.55e-05	2.81e-05	MinProb	5.55921	0.0445927	6.3e-06	1.04e-06	0.000101007	1.98e-05	QRILC	5.57657	0.0888813	1.02e-05	2.34e-06	0.000201573	5.86e-05	Hybrid	5.67894	0.0506978	1.61e-06	4.18e-07	9.14e-06	1.92e-06
sp|Q9C0J8|WDR33_HUMAN	WDR33	KNN ***	3	3	0	0.517659	0.206154	0.0807945	0.0976368	0.0548335	0.0332334	MLE ***	0.801875	1.59002	0.0922455	0.121091	0.060407	0.0700777	SVD	2.18479	0.312912	0.000406952	0.00172546	0.00189831	0.00642927	MinProb	7.54923	0.573218	7.08e-05	0.000203722	0.000475646	0.00104111	QRILC	8.33448	1.00783	0.00016966	0.000487968	0.00089847	0.00157554	Hybrid	6.95799	0.198566	2.24e-07	6.1e-07	1.72e-06	3.07e-06
